# Supplementary material
Source: Springer Nature journal article supplement (https://www.springermedizin.de/resource/supplementary/13099_2012_64_MOESM3_ESM.pdf/9665514)

DH5 $\alpha$  [pSB403] (AI-1)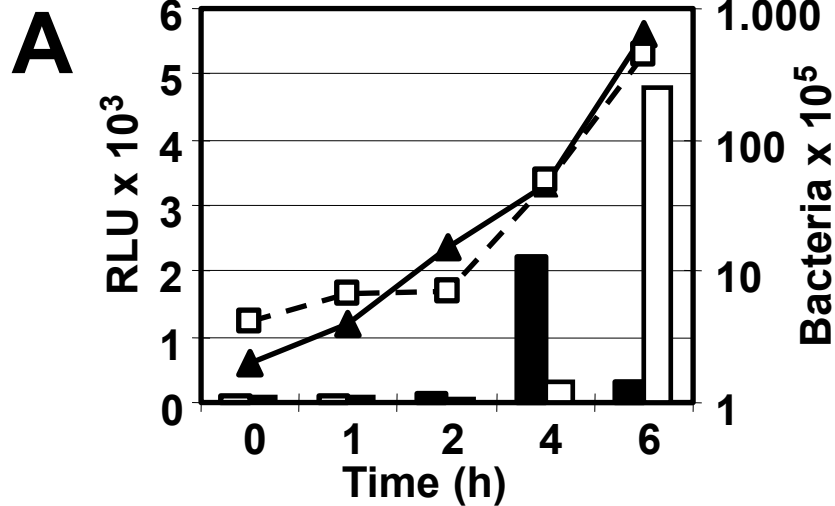*Vibrio harveyi* BB886 (AI-1)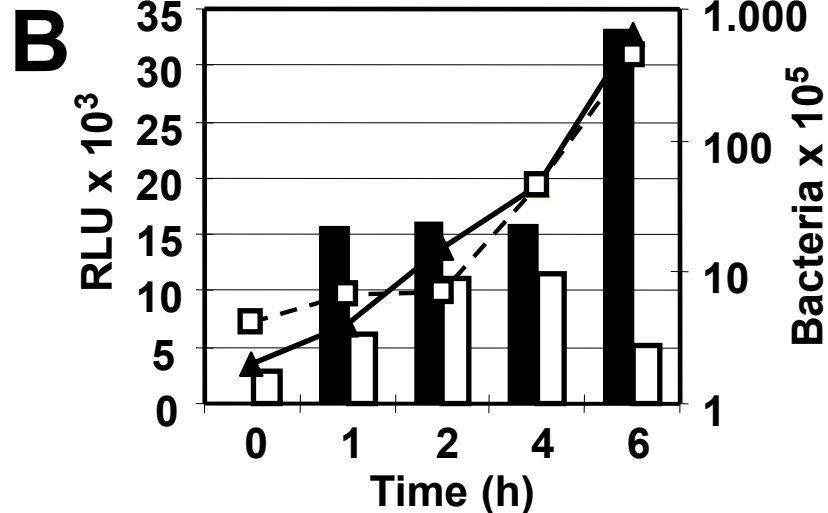*Vibrio harveyi* BB170 (AI-2)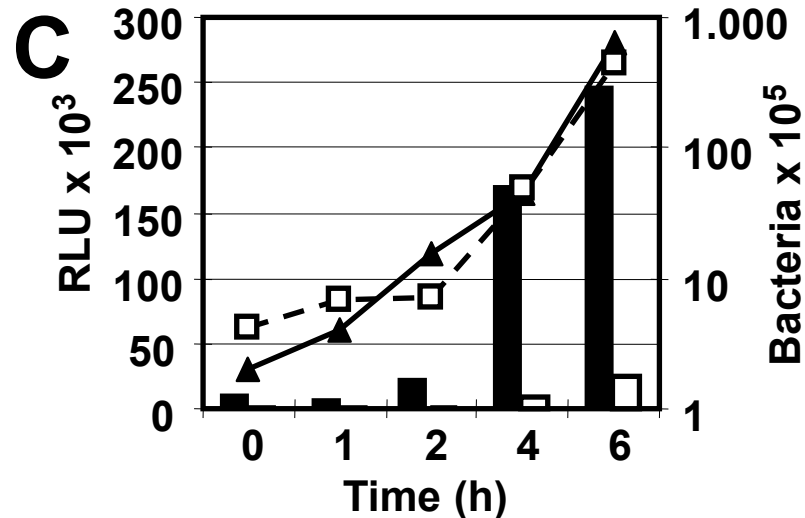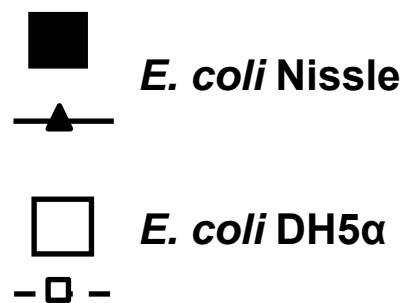

Supplement: MOESM3 [file 9665514]
